# Supplementary material for: Minimal Influence of Cayenne Pepper on the Human Gastrointestinal Microbiota and Intestinal Inflammation in Healthy Adult Humans—A Pilot Study
Source: MDPI journal article supplement (doi:10.3390/life12111849), 2022-11-11
Supplement: s1 [file s1]

Supplementary Figure S1. Bar charts of gut bacterial communities for each participant. A. All participants. B. Participants with BMI < 25. C. Participants with BMI > 25.

A. All Participants

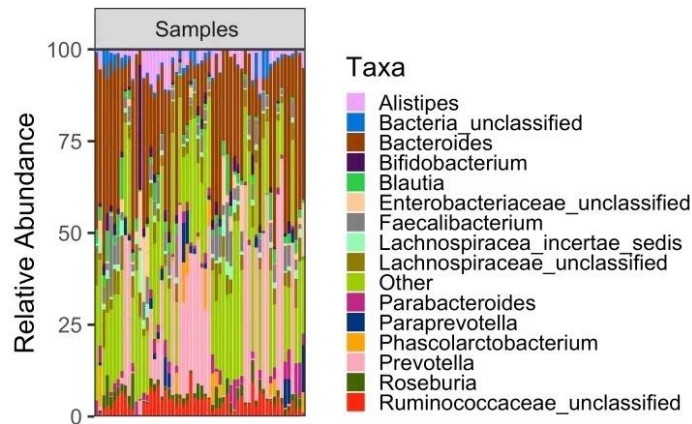

B. Participants with BMI < 25

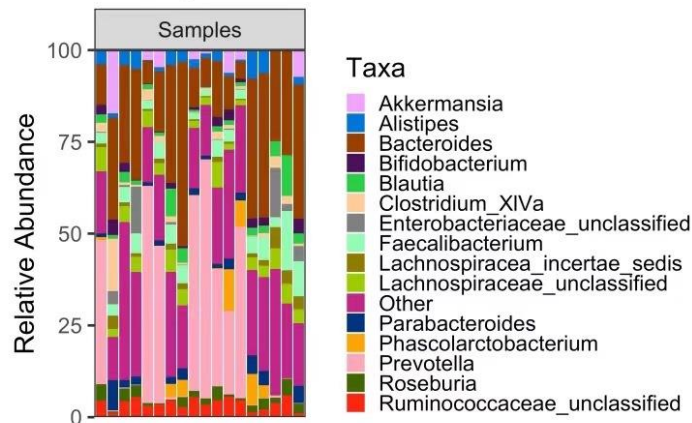

C. Participants with BMI > 25

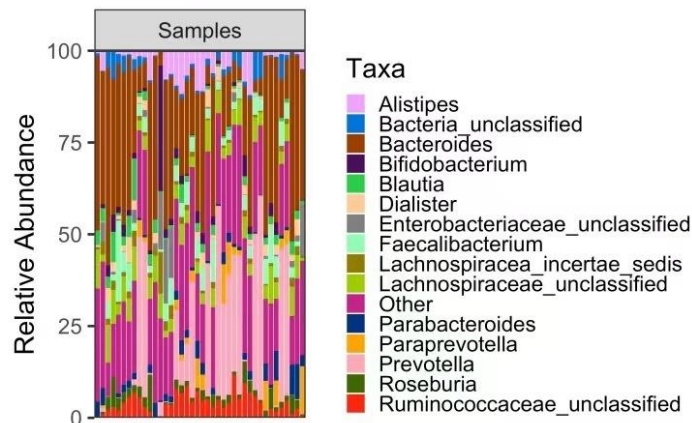

Supplementary Figure S2. Stool lipocalin concentrations were not associated with intestinal bacterial community membership (A,  $p=0.49$ ; B,  $p=0.75$ ) or composition (C,  $p=0.26$ ; D,  $p=0.39$ ). The gradient on the right of each plot indicates the lipocalin concentration in ng/mL. The darker the circle the higher the lipocalin concentration.

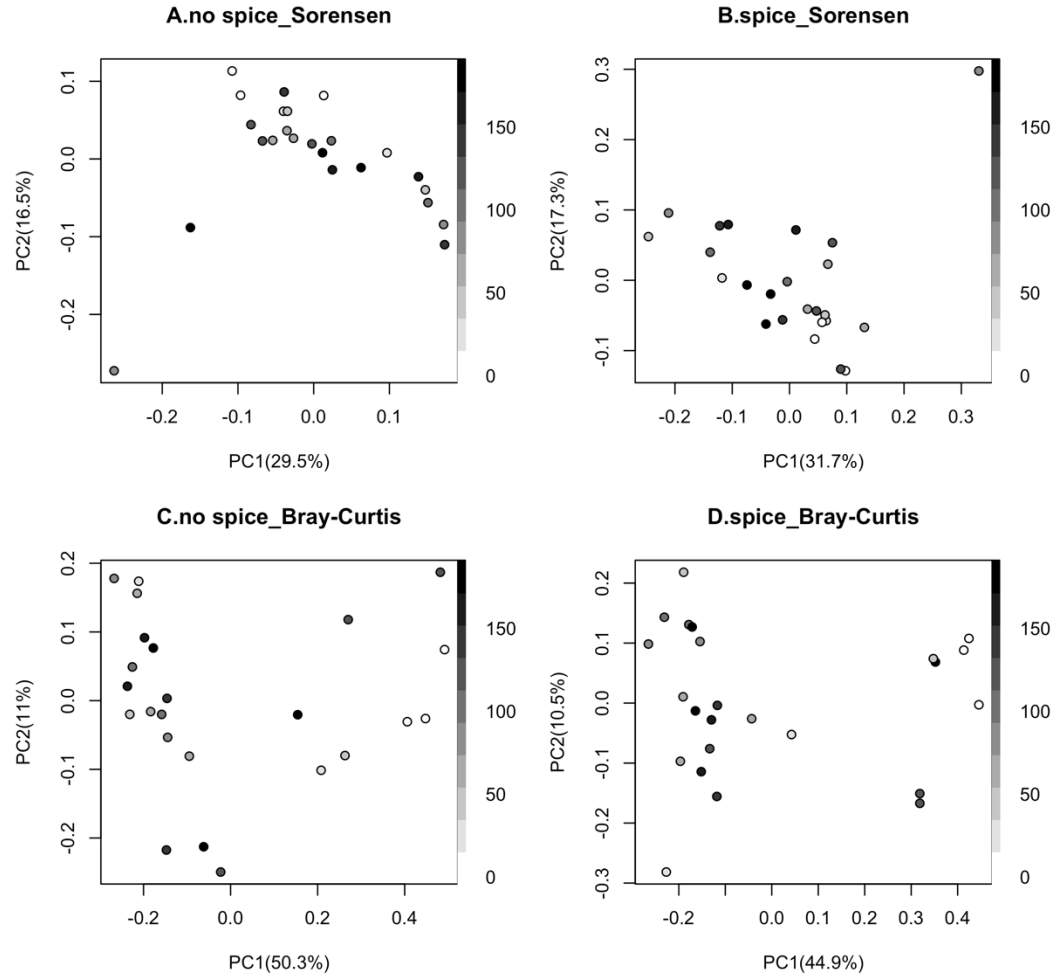

Supplementary Figure S3. Stool calprotectin concentrations were not associated with intestinal bacterial community membership (A,  $p=0.42$ ; B,  $p=0.84$ ) or composition (C,  $p=0.72$ ; D,  $p=0.79$ ). The gradient on the right of each plot indicates the calprotectin concentration in ng/mL. The darker the circle the higher the calprotectin concentration.

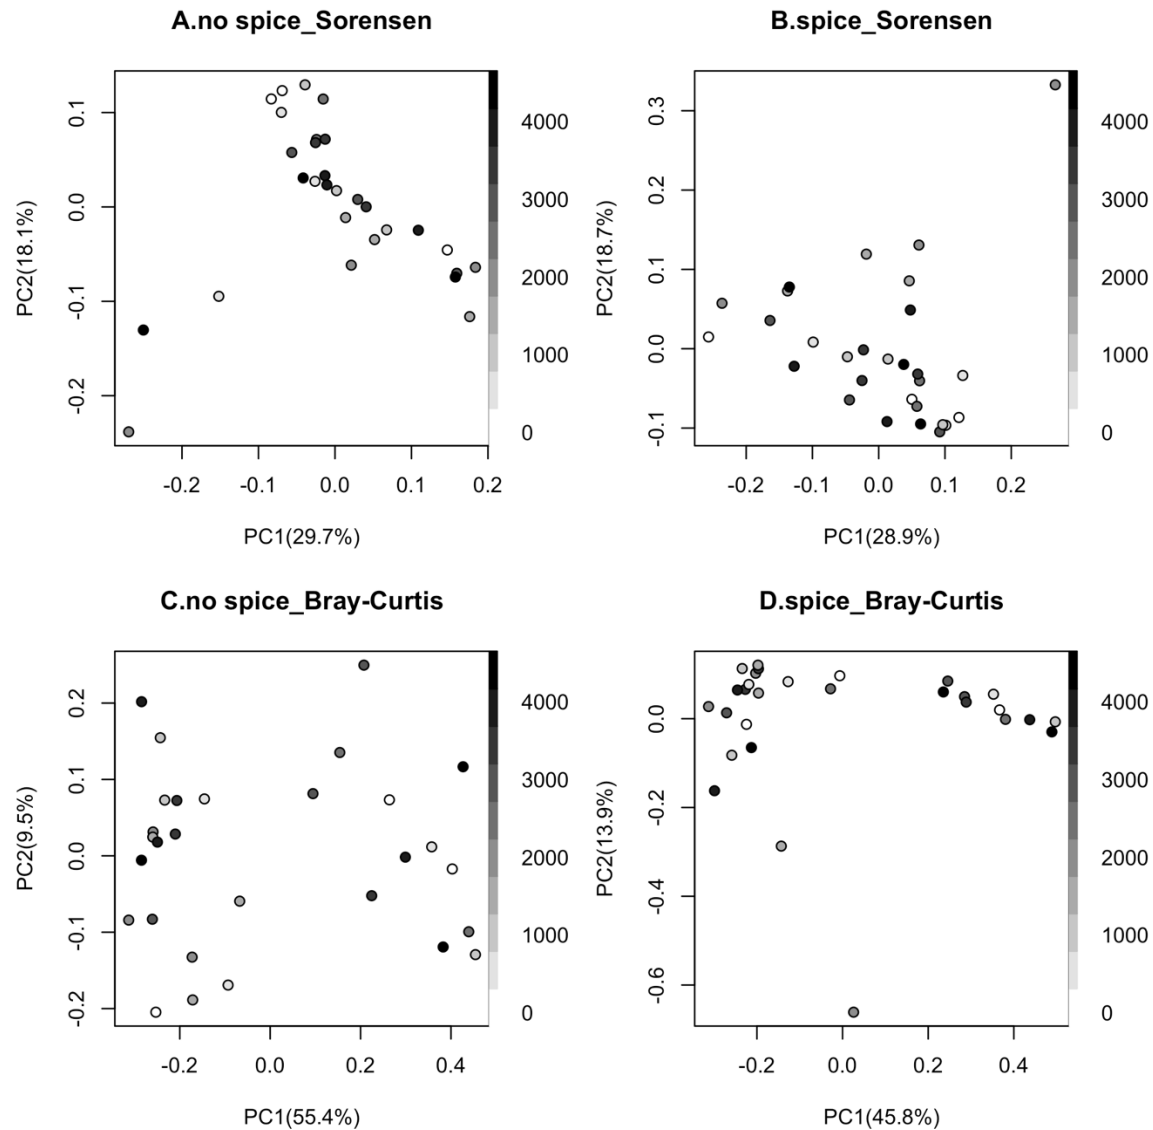

Supplementary Table S1. Alpha diversity of the gastrointestinal bacterial communities by clustering those with similarly responsive gut microbiota to cayenne pepper.

|            |                 | With spice | Without spice | p-value |
|------------|-----------------|------------|---------------|---------|
| Set1 (n=9) | Chao1           | 108.3 ± 64 | 100 ± 36.6    | 0.91    |
|            | Shannon         | 2.5 ± 0.4  | 2.5 ± 0.4     | 0.91    |
|            | Inverse Simpson | 6.2 ± 2.8  | 6.5 ± 3.6     | 1.0     |
| Set2 (n=7) | Chao1           | 80.7 ± 19  | 92.7 ± 44.8   | 0.81    |
|            | Shannon         | 2.3 ± 0.3  | 2.5 ± 0.2     | 0.33    |
|            | Inverse Simpson | 5.2 ± 2.1  | 5.8 ± 1.5     | 0.51    |

Data presented as mean±SD.
